# Supplementary material for: Thiacalix[4]arene-supported heterodinuclear NiII–LnIII complexes: slow magnetic relaxation behavior in the dysprosium analogue
Source: Royal Society of Chemistry journal article supplement (doi:10.1039/c5ra23697e), 2015-12-17
Supplement: c5ra23697e1.pdf [file c5ra23697e1.pdf]

## Electronic Supporting Information

### **Thiacalix[4]arene-supported heterodinuclear Ni<sup>II</sup>-Ln<sup>III</sup> complexes: slow magnetic relaxation behavior in dysprosium analogue**

Jing-Yuan Ge, Jia-Ze Xie, Zhuang-Yu Zhao, Jing Ru, You Song, Jing-Lin Zuo\*

*State Key Laboratory of Coordination Chemistry, School of Chemistry and Chemical Engineering, Collaborative Innovation Center of Advanced Microstructures, Nanjing University, Nanjing 210093, P. R. China*

---

\* To whom correspondence should be addressed. Email: zuojl@nju.edu.cn; Fax: +86-25-83314502.

Nanjing University.

## Caption of Content

1. **Table S1.** Selected bond angles ( $^{\circ}$ ) for **1–3**
2. **Table S2.** Fitting of the Cole-Cole plots for **3** with a generalized Debye model in the temperature range 1.9–5.0 K under 800 Oe dc field
3. **Table S3.** Fitting of the Cole-Cole plots for **3'** with a generalized Debye model in the temperature range 1.9–3.4 K under zero dc field
4. **Table S4.** Shape analysis for the metal centers of **3**
5. **Fig. S1** Left: crystal structure of complex  $[(\text{NiL}_1)\text{Gd}(\text{L}_2)(\text{CH}_3\text{OH})]\cdot\text{acetone}$  (**1**). Right: crystal structure of complex  $[(\text{NiL}_1)\text{Tb}(\text{L}_2)(\text{CH}_3\text{OH})]\cdot\text{acetone}$  (**2**). Hydrogen atoms and uncoordinated solvents are omitted for clarity. (Ln green, Ni turquoise, S yellow, O red, N blue and C gray)
6. **Fig. S2** (a) acetone molecule connects to the  $\text{Ni}^{\text{II}}\text{-Dy}^{\text{III}}$  clusters *via* weak  $\text{C-H}\cdots\text{O}$  (green dashed line) and  $\text{C-H}\cdots\pi$  (pink dashed line) interactions (b) Every two neighbouring clusters are linked together to give a dimer through  $\text{C-H}\cdots\pi$  interaction between solvent and the framework in **3**. (c)  $\text{C-H}\cdots\pi$  interactions drive the dimers to a 1D chain along *b* axis.
7. **Fig. S3** TGA curves for complexes **1–3**.
8. **Fig. S4** The XRPD patterns (red lines) obtained from the as-synthesized solids of **1–3** and the simulated XRPD patterns (blue lines) from single crystals of **1–3**.
9. **Fig. S5** Left: field-dependent magnetizations for **1** at  $T = 1.9\text{--}5.0$  K and  $H = 0\text{--}70$  kOe. Right: temperature dependence of magnetic entropy change ( $-\Delta S_m$ ) as calculated from the magnetization data of **1** at  $T = 1.9\text{--}5.0$  K and  $0\text{--}70$  kOe.
10. **Fig. S6** Frequency-dependent in-phase  $\chi'$  and out-of-phase  $\chi''$  ac susceptibility signals for **3** at the indicated temperatures under zero dc field.
11. **Fig. S7** Temperature-dependent in-phase  $\chi'$  and out-of-phase  $\chi''$  ac susceptibility signals for **3** at the indicated frequencies under zero dc field.
12. **Fig. S8** Plot of out-of-phase  $\chi''$  *versus* frequency at 1.9 K for **3** under the application of variable dc fields, ranging from 0 to 3000 Oe.

- 13. Fig. S9** The XRPD pattern of complex **3'** is consistent with that of complex **3**.
- 14. Fig. S10** Frequency-dependent in-phase  $\chi'$  and out-of-phase  $\chi''$  ac susceptibility signals for **3'** at the indicated frequencies under zero dc field.
- 15. Fig. S11** Cole-Cole plots for **3'** under zero dc field. The solid lines represent the fit to the Debye model at the indicated temperatures.
- 16. Fig. S12** Temperature-dependent in-phase  $\chi'$  and out-of-phase  $\chi''$  ac susceptibility signals for **2** at the frequency of 999 Hz under zero dc field.
- 17. Fig. S13** Temperature-dependent in-phase  $\chi'$  and out-of-phase  $\chi''$  ac susceptibility signals for **2** at the frequency of 999 Hz under 800 Oe dc field.

**Table S1.** Selected bond angles (°) for **1–3**

|                 | <b>1 (Gd)</b> | <b>2 (Tb)</b> | <b>3 (Dy)</b> |
|-----------------|---------------|---------------|---------------|
| O(5)-Ln(1)-O(7) | 101.98(12)    | 101.72(14)    | 102.05(10)    |
| O(5)-Ln(1)-O(3) | 169.22(12)    | 169.45(14)    | 169.55(10)    |
| O(7)-Ln(1)-O(3) | 86.39(11)     | 86.39(14)     | 86.06(9)      |
| O(5)-Ln(1)-O(1) | 106.61(12)    | 106.78(14)    | 106.16(9)     |
| O(7)-Ln(1)-O(1) | 134.18(11)    | 134.15(14)    | 134.35(9)     |
| O(3)-Ln(1)-O(1) | 71.06(11)     | 71.06(13)     | 71.59(9)      |
| O(5)-Ln(1)-O(8) | 92.88(12)     | 92.76(14)     | 92.63(9)      |
| O(7)-Ln(1)-O(8) | 141.69(12)    | 141.61(14)    | 141.82(10)    |
| O(3)-Ln(1)-O(8) | 76.36(11)     | 76.72(13)     | 76.95(9)      |
| O(1)-Ln(1)-O(8) | 71.69(11)     | 72.07(13)     | 71.76(9)      |
| O(5)-Ln(1)-O(4) | 81.38(11)     | 81.26(13)     | 81.48(9)      |
| O(7)-Ln(1)-O(4) | 79.50(11)     | 79.67(13)     | 79.44(9)      |
| O(3)-Ln(1)-O(4) | 107.08(10)    | 107.06(13)    | 106.74(9)     |
| O(1)-Ln(1)-O(4) | 70.45(10)     | 70.25(12)     | 70.27(8)      |
| O(8)-Ln(1)-O(4) | 138.11(11)    | 138.12(13)    | 138.08(9)     |
| O(5)-Ln(1)-O(6) | 78.73(11)     | 78.88(13)     | 79.06(9)      |
| O(7)-Ln(1)-O(6) | 78.33(11)     | 78.25(13)     | 78.57(9)      |
| O(3)-Ln(1)-O(6) | 96.57(11)     | 96.44(13)     | 96.34(9)      |
| O(1)-Ln(1)-O(6) | 141.71(10)    | 141.77(13)    | 141.43(9)     |
| O(8)-Ln(1)-O(6) | 70.17(11)     | 69.89(13)     | 69.82(9)      |
| O(4)-Ln(1)-O(6) | 146.27(9)     | 146.45(11)    | 146.72(8)     |
| N(1)-Ni(1)-N(2) | 87.23(16)     | 87.40(19)     | 87.11(13)     |
| N(1)-Ni(1)-O(2) | 98.00(16)     | 98.15(18)     | 98.10(13)     |
| N(2)-Ni(1)-O(2) | 90.01(15)     | 89.84(17)     | 90.05(12)     |
| N(1)-Ni(1)-O(3) | 169.11(15)    | 168.95(18)    | 168.56(12)    |
| N(2)-Ni(1)-O(3) | 102.31(15)    | 102.18(17)    | 102.87(12)    |
| O(2)-Ni(1)-O(3) | 87.36(13)     | 87.48(15)     | 87.60(11)     |
| N(1)-Ni(1)-O(1) | 88.42(15)     | 88.30(17)     | 88.59(12)     |
| N(2)-Ni(1)-O(1) | 173.57(15)    | 173.64(17)    | 173.47(12)    |
| O(2)-Ni(1)-O(1) | 85.91(13)     | 86.12(15)     | 85.69(10)     |
| O(3)-Ni(1)-O(1) | 82.48(13)     | 82.57(14)     | 81.93(10)     |
| N(1)-Ni(1)-N(3) | 90.14(17)     | 90.1(2)       | 90.13(14)     |

|                  |            |            |            |
|------------------|------------|------------|------------|
| N(2)-Ni(1)-N(3)  | 83.86(16)  | 83.87(19)  | 83.84(13)  |
| O(2)-Ni(1)-N(3)  | 169.58(16) | 169.41(17) | 169.50(12) |
| O(3)-Ni(1)-N(3)  | 85.74(15)  | 85.54(17)  | 85.46(12)  |
| O(1)-Ni(1)-N(3)  | 100.88(14) | 100.83(17) | 101.09(11) |
| Ni(1)-O(1)-Ln(1) | 102.77(13) | 102.39(15) | 102.40(10) |
| Ni(1)-O(3)-Ln(1) | 103.61(14) | 103.90(16) | 103.98(11) |

**Table S2.** Fitting of the Cole-Cole plots for **3** with a generalized Debye model in the temperature range 1.9–5.0 K under 800 Oe dc field

| T / K | $\chi_S / \text{cm}^3 \text{mol}^{-1}$ | $\chi_T / \text{cm}^3 \text{mol}^{-1}$ | $\ln(\tau / \text{s})$ | $\alpha$ |
|-------|----------------------------------------|----------------------------------------|------------------------|----------|
| 1.9   | 0.734                                  | 9.954                                  | -4.663                 | 0.167    |
| 2.2   | 0.769                                  | 8.672                                  | -5.517                 | 0.133    |
| 2.5   | 0.809                                  | 7.762                                  | -6.152                 | 0.113    |
| 2.8   | 0.829                                  | 7.013                                  | -6.650                 | 0.099    |
| 3.3   | 0.841                                  | 6.005                                  | -7.284                 | 0.082    |
| 3.8   | 0.830                                  | 5.237                                  | -7.746                 | 0.073    |
| 4.5   | 0.801                                  | 4.404                                  | -8.227                 | 0.064    |
| 5.0   | 0.741                                  | 3.939                                  | -8.510                 | 0.062    |

**Table S3.** Fitting of the Cole-Cole plots for **3'** with a generalized Debye model in the temperature range 1.9–3.4 K under zero dc field

| T / K | $\chi_S / \text{cm}^3 \text{mol}^{-1}$ | $\chi_T / \text{cm}^3 \text{mol}^{-1}$ | $\ln(\tau / \text{s})$ | $\alpha$ |
|-------|----------------------------------------|----------------------------------------|------------------------|----------|
| 1.9   | 0.547                                  | 0.870                                  | -5.932                 | 0.239    |
| 2.2   | 0.497                                  | 0.768                                  | -6.532                 | 0.181    |
| 2.5   | 0.454                                  | 0.686                                  | -7.038                 | 0.146    |
| 2.8   | 0.417                                  | 0.622                                  | -7.451                 | 0.127    |
| 3.1   | 0.386                                  | 0.567                                  | -7.802                 | 0.109    |
| 3.4   | 0.357                                  | 0.521                                  | -8.103                 | 0.108    |

**Table S4.** Shape analysis for the metal centers of **3**

| ML7 | PBPY-7       | COC-7 | CTPR-7 | JPBPY-7 |
|-----|--------------|-------|--------|---------|
| Dy1 | <b>3.137</b> | 3.687 | 3.258  | 5.505   |

PBPY-7 (D5h): Pentagonal bipyramid      COC-7 (C3v): Capped octahedron  
CTPR-7 (C2v): Capped trigonal prism      JPBPY-7 (D5h): Johnson pentagonal bipyramid J13

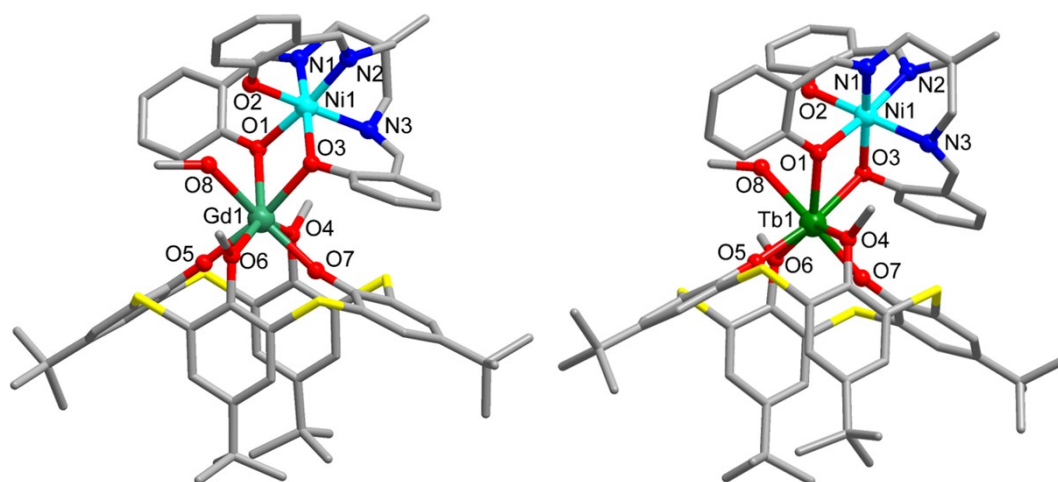

**Fig. S1** Left: crystal structure of complex  $[(\text{NiL}_1)\text{Gd}(\text{L}_2)(\text{CH}_3\text{OH})]\cdot\text{acetone}$  (**1**). Right: crystal structure of complex  $[(\text{NiL}_1)\text{Tb}(\text{L}_2)(\text{CH}_3\text{OH})]\cdot\text{acetone}$  (**2**). Hydrogen atoms and uncoordinated solvents are omitted for clarity. (Ln green, Ni turquoise, S yellow, O red, N blue and C gray)

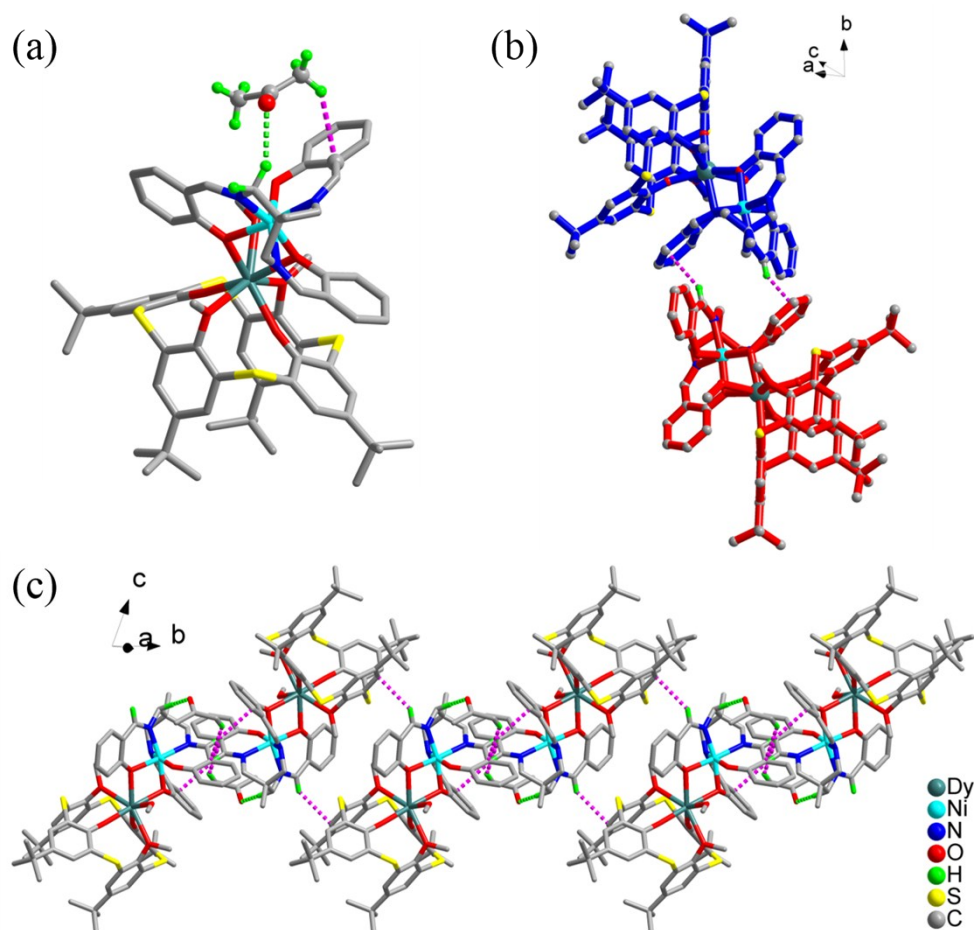

**Fig. S2** (a) acetone molecule connects to the  $\text{Ni}^{\text{II}}\text{-Dy}^{\text{III}}$  clusters *via* weak  $\text{C-H}\cdots\text{O}$  (green dashed line) and  $\text{C-H}\cdots\pi$  (pink dashed line) interactions (b) Every two

neighbouring clusters are linked together to give a dimer through C–H $\cdots\pi$  interaction between solvent and the framework in **3**. (c) C–H $\cdots\pi$  interactions drive the dimers to a 1D chain along *b* axis.

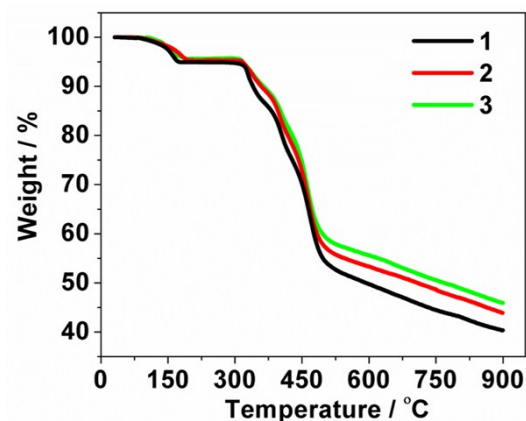

**Fig. S3** TGA curves for complexes **1–3**.

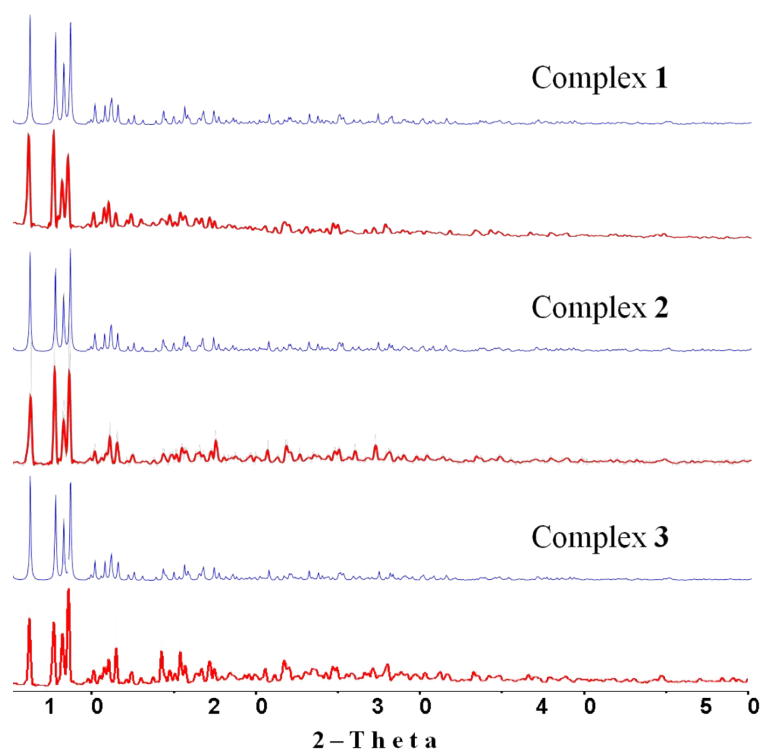

**Fig. S4** The XRPD patterns (red lines) obtained from the as-synthesized solids of **1–3** and the simulated XRPD patterns (blue lines) from single crystals of **1–3**.

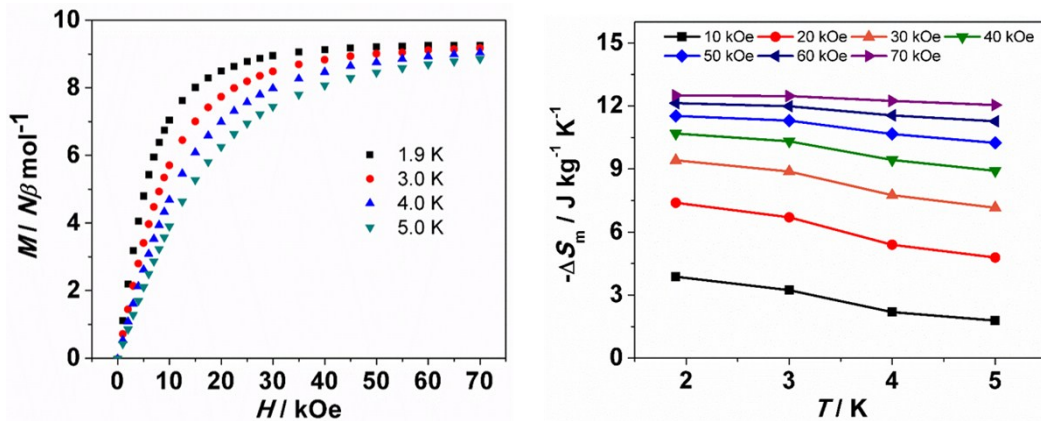

**Fig. S5** Left: field-dependent magnetizations for **1** at  $T = 1.9\text{--}5.0\text{ K}$  and  $H = 0\text{--}70\text{ kOe}$ . Right: temperature dependence of magnetic entropy change ( $-\Delta S_m$ ) as calculated from the magnetization data of **1** at  $T = 1.9\text{--}5.0\text{ K}$  and  $0\text{--}70\text{ kOe}$ .

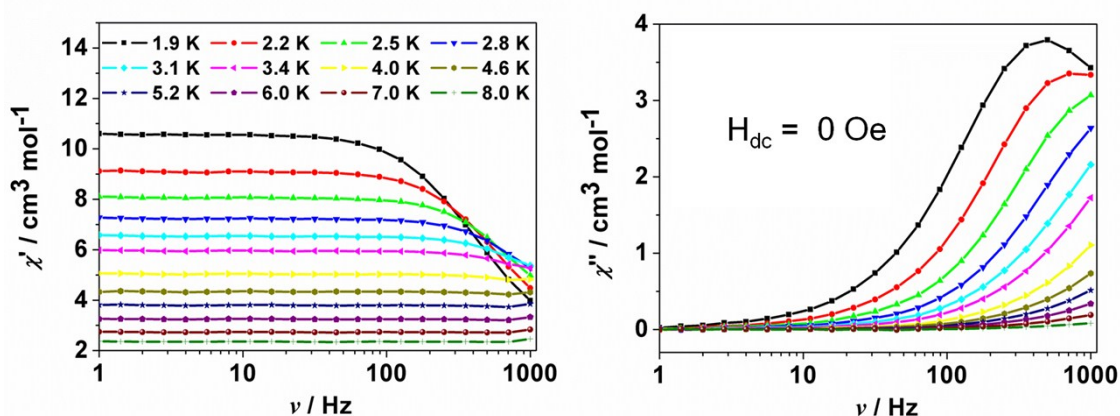

**Fig. S6** Frequency-dependent in-phase  $\chi'$  and out-of-phase  $\chi''$  ac susceptibility signals for **3** at the indicated temperatures under zero dc field.

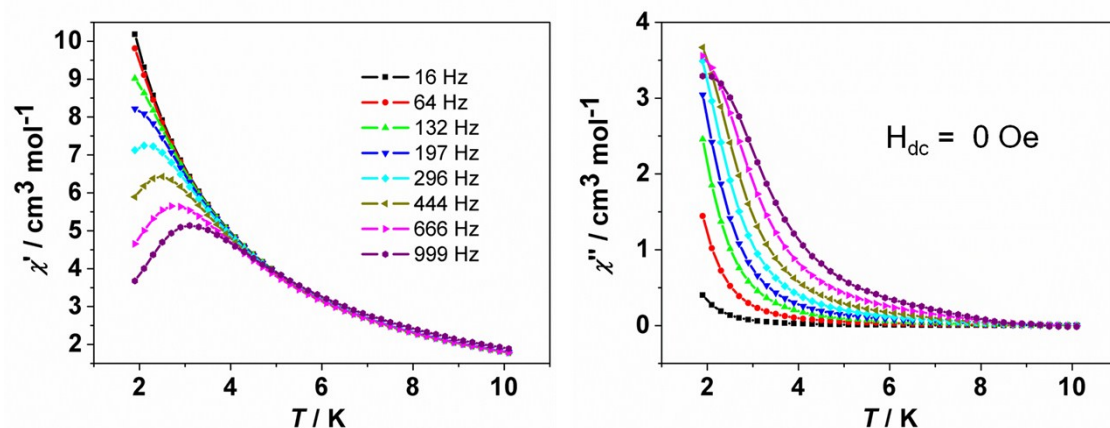

**Fig. S7** Temperature-dependent in-phase  $\chi'$  and out-of-phase  $\chi''$  ac susceptibility signals for **3** at the indicated frequencies under zero dc field.



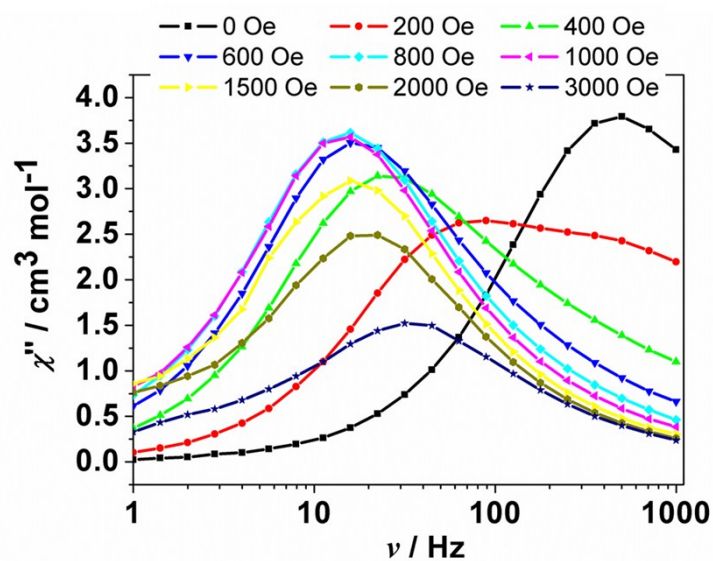

**Fig. S8** Plot of out-of-phase  $\chi''$  versus frequency at 1.9 K for **3** under the application of variable dc fields, ranging from 0 to 3000 Oe.

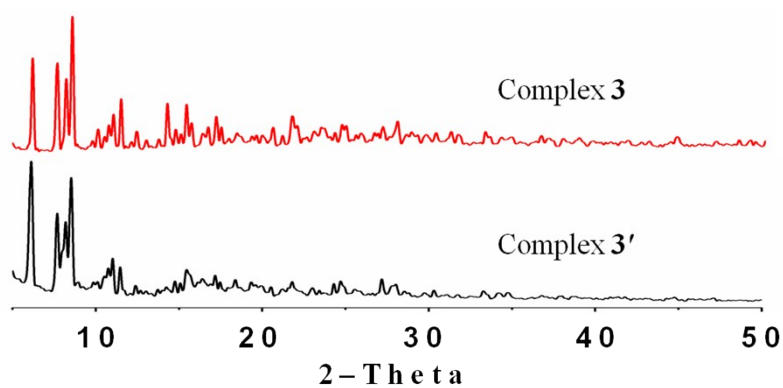

**Fig. S9** The XRPD pattern of complex **3'** is consistent with that of complex **3**.

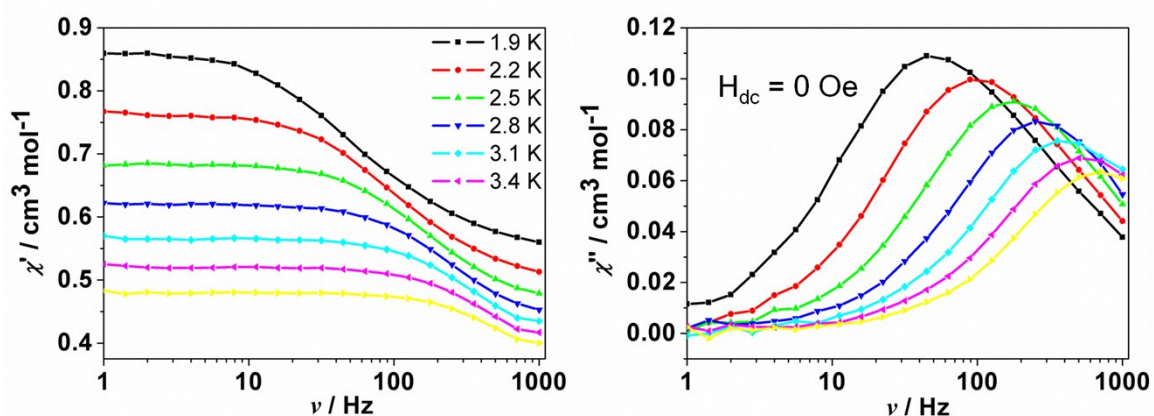

**Fig. S10** Frequency-dependent in-phase  $\chi'$  and out-of-phase  $\chi''$  ac susceptibility signals for **3'** at the indicated frequencies under zero dc field.

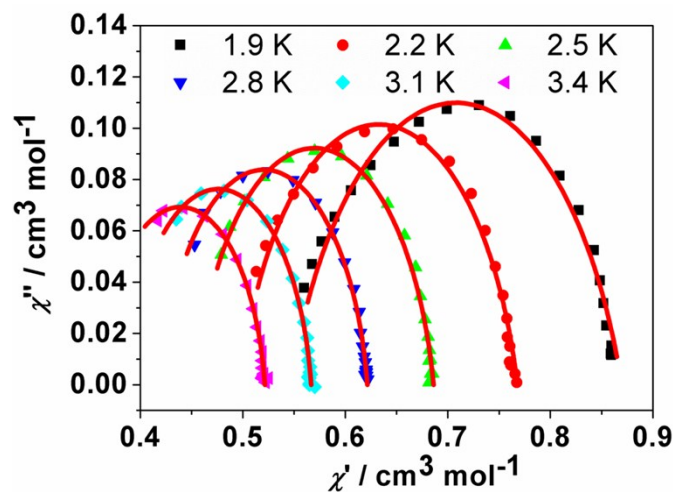

**Fig. S11** Cole-Cole plots for **3'** under zero dc field. The solid lines represent the fit to the Debye model at the indicated temperatures.

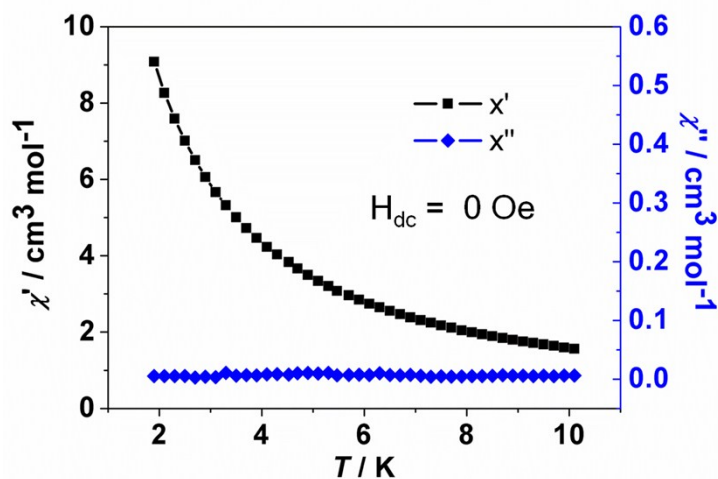

**Fig. S12** Temperature-dependent in-phase  $\chi'$  and out-of-phase  $\chi''$  ac susceptibility signals for **2** at the frequency of 999 Hz under zero dc field.

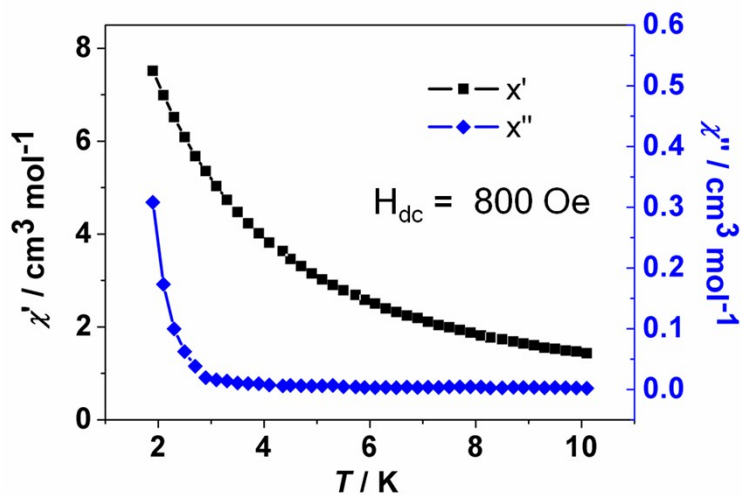

**Fig. S13** Temperature-dependent in-phase  $\chi'$  and out-of-phase  $\chi''$  ac susceptibility signals for **2** at the frequency of 999 Hz under 800 Oe dc field.
